# Supplementary material for: Inflorescence Traits and Floral Quality Parameters in Promising Olive Clones (cv Leccino): Influence of the Canopy Position
Source: MDPI journal article supplement (doi:10.3390/horticulturae8050402), 2022-05-03
Supplement: s1 [file s1]

Supplementary materials

**Table S1.** The Kruskal-Wallis test results used for comparison of the daily mean air temperatures measured at the experimental site from January to May 2017, 2018 and the 20 years average (1995–2015).

| Month | Year      | Mean | Count | Score sum | Expected score | Score mean | (Mean-Mean0)/Std0 | ChiSquare | DF | Prob>ChiSq |
|-------|-----------|------|-------|-----------|----------------|------------|-------------------|-----------|----|------------|
| Jan   | 1996-2015 | 7.0  | 31    | 1160.0    | 1457           | 37.42      | -2.416            | 40.68     | 2  | <.0001*    |
|       | 2017      | 5.5  | 31    | 978.5     | 1457           | 31.56      | -3.896            |           |    |            |
|       | 2018      | 10.6 | 31    | 2232.5    | 1457           | 72.02      | 6.316             |           |    |            |
| Feb   | 1996-2015 | 7.8  | 28    | 889.5     | 1190           | 31.77      | -2.847            | 43.23     | 2  | <.0001*    |
|       | 2017      | 10.7 | 28    | 1881.0    | 1190           | 67.18      | 6.552             |           |    |            |
|       | 2018      | 6.8  | 28    | 799.5     | 1190           | 28.55      | -3.701            |           |    |            |
| Mar   | 1996-2015 | 10.8 | 31    | 1160.0    | 1457           | 37.42      | -2.417            | 30.04     | 2  | <.0001*    |
|       | 2017      | 13.1 | 31    | 2128.0    | 1457           | 68.64      | 5.465             |           |    |            |
|       | 2018      | 9.4  | 31    | 1083.0    | 1457           | 34.93      | -3.044            |           |    |            |
| Apr   | 1996-2015 | 14.2 | 30    | 990.0     | 1365           | 33.00      | -3.206            | 14.53     | 2  | 0.0007*    |
|       | 2017      | 14.8 | 30    | 1344.5    | 1365           | 44.82      | -0.171            |           |    |            |
|       | 2018      | 16.6 | 30    | 1760.5    | 1365           | 58.68      | 3.381             |           |    |            |
| May   | 1996-2015 | 18.2 | 31    | 1209.0    | 1457           | 39.00      | -2.017            | 4.26      | 2  | 0.1190     |
|       | 2017      | 19.1 | 31    | 1537.0    | 1457           | 49.58      | 0.648             |           |    |            |
|       | 2018      | 19.3 | 31    | 1625.0    | 1457           | 52.42      | 1.365             |           |    |            |

**Table S2.** Two-way ANOVA results relating to the characteristics of inflorescences (length, flowers per inflorescence), flowers (open and perfect flowers) and pollen viability of three Leccino clones (L 1.3, L 1.4, L 1.9) in 2017 and 2018. Main effect: year (Y), canopy position (CP). F- and *p*-values are shown; ns not significant.

| Clone | Factor          | Inflorescence<br>Length |          | Flowers per inflorescence |          | Open flowers |          | Perfect flowers |          | Pollen Viability |          |
|-------|-----------------|-------------------------|----------|---------------------------|----------|--------------|----------|-----------------|----------|------------------|----------|
|       |                 | F                       | <i>p</i> | F                         | <i>p</i> | F            | <i>p</i> | F               | <i>p</i> | F                | <i>p</i> |
| L 1.3 | Year            | 22.45                   | <0.0001  | 2.55                      | ns       | 1.21         | ns       | 0.66            | ns       | 0.57             | ns       |
|       | Canopy Position | 23.40                   | <0.0001  | 8.99                      | 0,0038   | 38.89        | 0.0034   | 0.64            | ns       | 2.44             | ns       |
|       | Y x CP          | 0.72                    | ns       | 0.76                      | ns       | 47.61        | 0.0023   | 0.72            | ns       | 0.25             | ns       |
| L 1.4 | Year            | 1.66                    | ns       | 0.49                      | ns       | 12.77        | 0.0233   | 0.21            | ns       | 0.74             | ns       |
|       | Canopy Position | 0.85                    | ns       | 0.25                      | ns       | 45.11        | 0.0026   | 1.21            | ns       | 0.60             | ns       |
|       | Y x CP          | 0.69                    | ns       | 0.19                      | ns       | 1.89         | ns       | 0.19            | ns       | 0.09             | ns       |
| L 1.9 | Year            | 1.58                    | ns       | 12.25                     | 0.0008   | 0.30         | ns       | 40.56           | <0.0001  | 48.17            | 0.0001   |
|       | Canopy Position | 2.04                    | ns       | 2.75                      | ns       | 0.32         | ns       | 1.07            | ns       | 52.02            | <0.0001  |
|       | Y x CP          | 0.73                    | ns       | 1.03                      | ns       | 0.04         | ns       | 1.10            | ns       | 60.17            | <0.0001  |
